# Supplementary material
Source: Springer Nature journal article supplement (https://www.springermedizin.de/resource/supplementary/12885_2012_3443_MOESM2_ESM.pdf/9463634)
Supplement: MOESM2 [file 9463634]

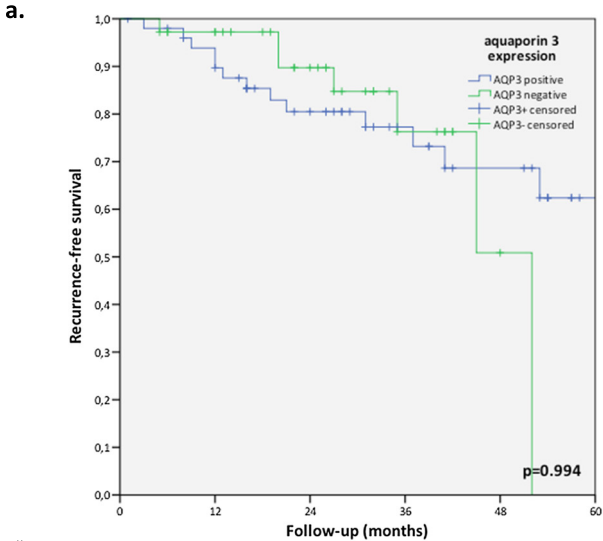

| Follow-up (months) | 0  | 12 | 24 | 36 | 48 | 60 |
|--------------------|----|----|----|----|----|----|
| No. at risk        | 87 | 77 | 54 | 27 | 15 | 3  |
| No. events         | 4  | 8  | 3  | 3  | 2  | 1  |

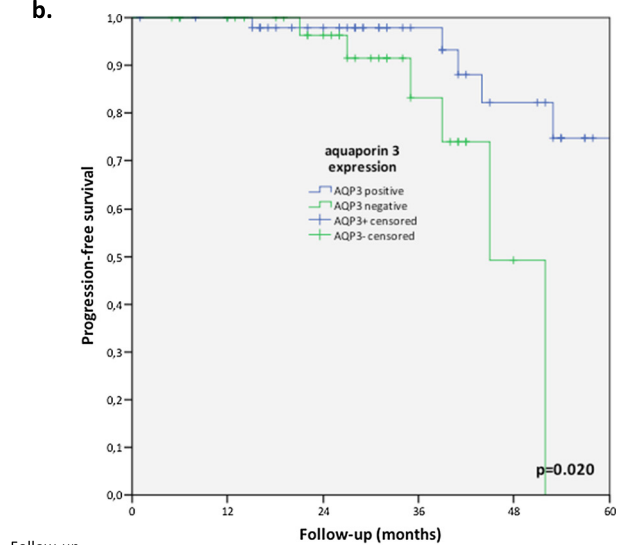

| Follow-up (months) | 0  | 12 | 24 | 36 | 48 | 60 |
|--------------------|----|----|----|----|----|----|
| No. at risk        | 87 | 81 | 62 | 30 | 15 | 3  |
| No. events         | 0  | 2  | 2  | 5  | 2  | 0  |

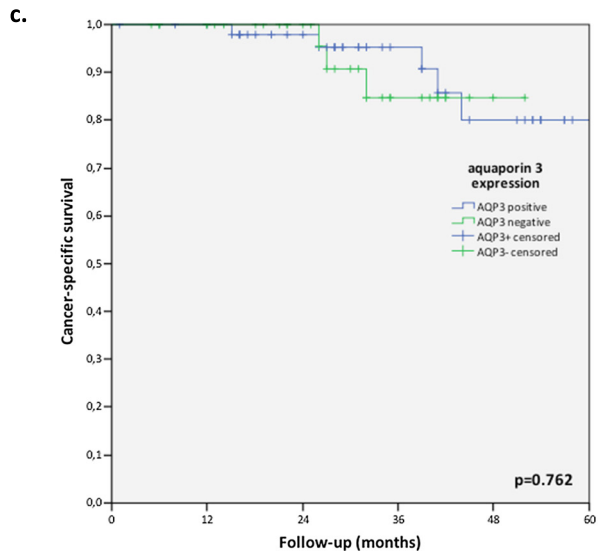

| Follow-up (months) | 0  | 12 | 24 | 36 | 48 | 60 |
|--------------------|----|----|----|----|----|----|
| No. at risk        | 87 | 81 | 62 | 30 | 15 | 3  |
| No. events         | 0  | 1  | 4  | 3  | 0  | 0  |
